# Supplementary material
Source: ML conference proceedings conference paper supplement (https://openreview.net/forum?id=Vp6HAjrdIg)
Supplement: supplementary_material [file attachment]

---

# Supplementary Materials:

## FiVA: Fine-grained Visual Attribute Dataset for Text-to-Image Diffusion Models

---

1 In the supplementary material, we include links to the dataset, metadata, and documentation in  
2 Section A. We then introduce additional details on dataset construction in Section B. Further, we  
3 present more details on the experimental setup and additional experimental results in Section C.  
4 Finally, we discuss the limitations and future work of the project in Section D. Please also find the  
5 datasheet for the dataset in Section E.

### 6 **A Dataset Information**

#### 7 **A.1 Dataset Link and Documentation**

8 Our dataset, metadata, and its license are currently maintained on huggingface<sup>1</sup> for users to download:  
9 <https://huggingface.co/datasets/FiVA/FiVA>. It contains the generated images and their  
10 metadata, the the original taxonomy of visual attributes and subjects to create the prompts, and the  
11 data filtering file. For each of the images, the main visual attribute type, keyword, subject, and prompt  
12 is stored in the metadata. A detailed documentation of dataset structure and usage as well as an  
13 example of the metadata can be found in the dataset card via the URL above. The Croissant link can  
14 be find here <https://huggingface.co/api/datasets/FiVA/FiVA/croissant>.

#### 15 **A.2 Author Statement and Data License**

16 The authors bear all responsibility in case of violation of rights and confirm that this dataset is  
17 open-sourced under the Playground v2.5 Community License license.

### 18 **B Additional Details on Dataset Construction**

19 **Details on attribute taxonomy and statistics.** When constructing the attribute library, for color,  
20 lighting, dynamics, artistic stroke, and focus and depth of field, we create a list of  
21 short descriptions or keywords for each kind of subcategory together with a list of major subjects  
22 that can fit into the description. When constructing the prompt, we simply link the attribute and  
23 the subject with a comma. For two specific attribute types, namely rhythm and design, the visual  
24 results can hardly be presented simply via short descriptions or keywords. We use long descriptions  
25 with “[sks]” denoting the placeholder for subjects that might fit into the sentence. Prompts are created  
26 by replacing “[sks]” with each of the subject candidates. We show the visualization of a rough  
27 distribution of attributes and subjects in Figure S2, as well as an example of constructing a pair of  
28 images that share similar lighting conditions. We also show some more examples of images with  
29 different visual attributes in Figure S1.

---

<sup>1</sup><https://huggingface.co/>

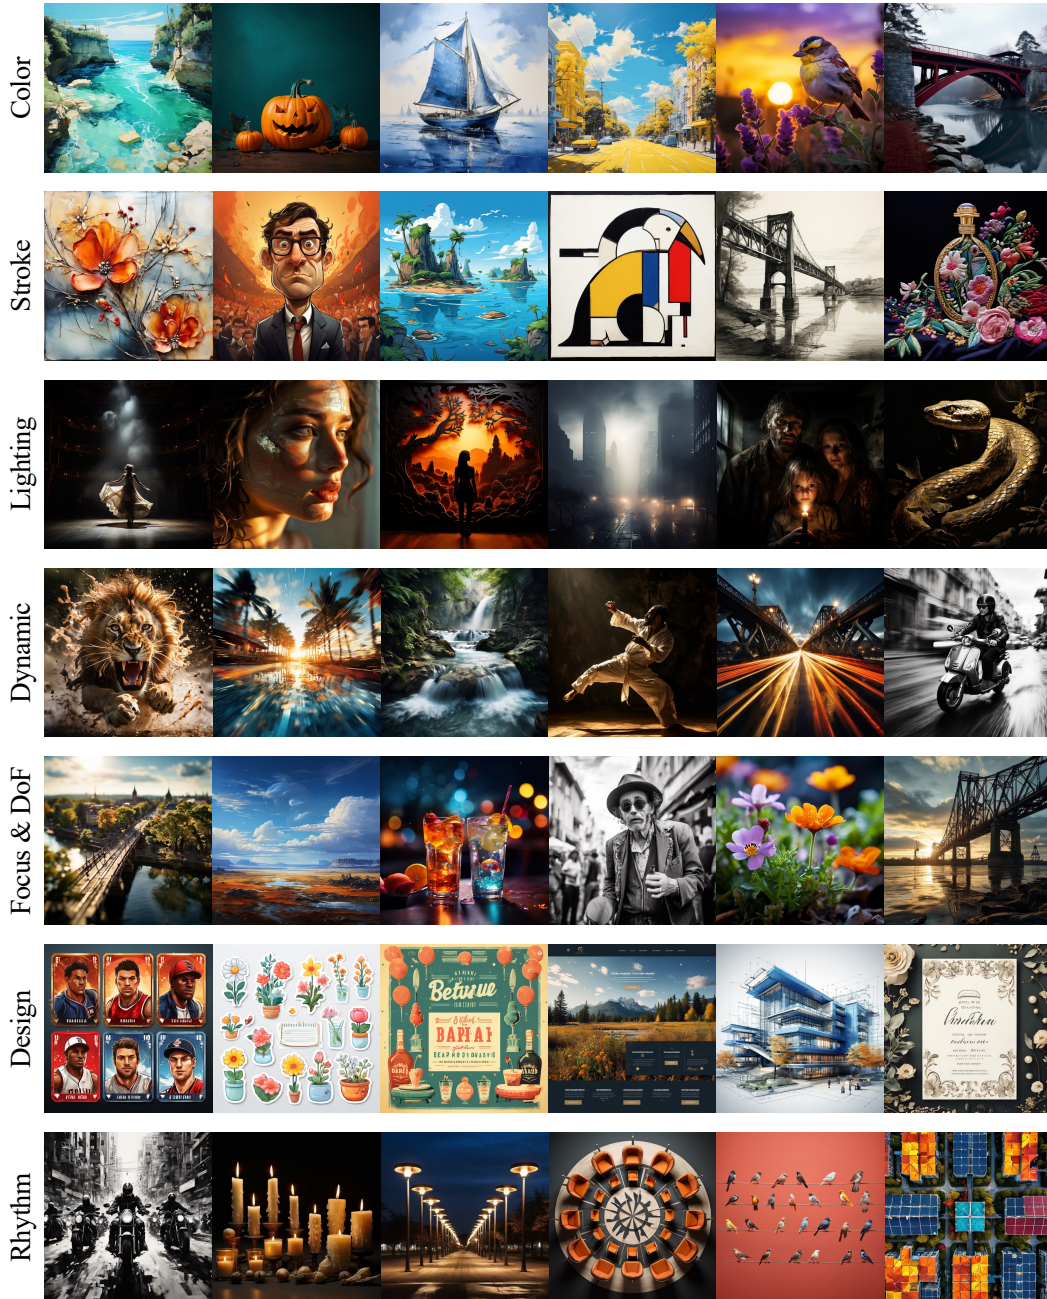

Figure S1: More image examples with different visual attributes.

30 **Details on the Range-sensitive Data Filtering.** To achieve attribute-consistent image pairs, we  
 31 need to establish a set of ranges for each attribute where any two images maintain consistency. We  
 32 organize images into a hierarchy of Set/Major-subject/Sub-subject, with the largest set being  
 33 the aforementioned “group of suitable subjects.” Figure S3a shows an example of the hierarchical  
 34 structure of images related to the attribute ‘lighting: moonlight’ featuring 7 major-subjects and over  
 35 100 sub-subjects. Within this hierarchy, each sub-subject corresponds to a list of images, where each  
 36 image belongs to that sub-subject and possesses the visual attribute of ‘lighting: moonlight’.

37 We apply *Range-sensitive Data Filtering* to this hierarchy: We first validate the consistency within  
 38 each specific Major-subject. Subsequently, we validate the Set encompassing all validated major-  
 39 subjects. For any major-subject that failed to pass the validation, we then check their Sub-subjects.

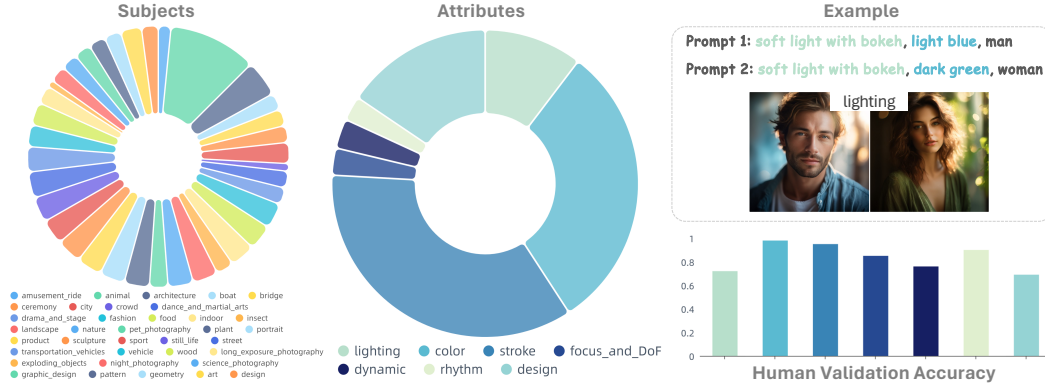

Figure S2: **Statistics and Analysis.** We visualize the rough distribution of visual attributes and subjects on the left. On the right, we show an example pair of images that shares similar lighting condition. We also visualize the attribute alignment accuracy via human validation here.

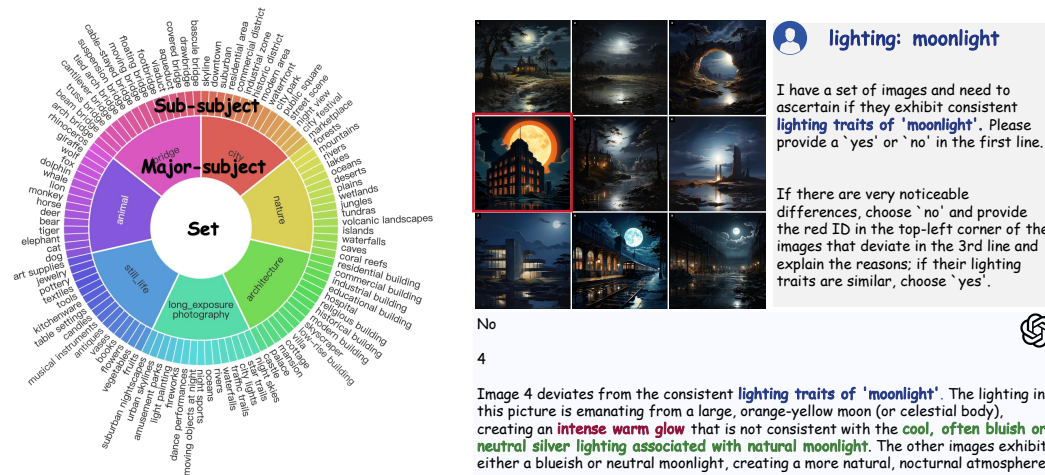

Figure S3: **Range-sensitive Data Filtering.** Taking the attribute *lighting: moonlight* as an example, (a) demonstrates the hierarchy of Set/Major-subject/Sub-subject. It lists the “group of suitable subjects” chosen when generating images related to *lighting: moonlight*, along with sub-subjects under each major-subject. Due to space limitations, only 15 sub-subjects are listed for each major-subject. (b) verifies whether the images under major-subject: *architecture* exhibit consistent lighting traits of *moonlight*. The result shows that Image 4 exhibits inconsistencies, with the reasons provided.

40 As shown in Figure S3b, from the range we want to verify, we sample 9 images and arrange them in  
 41 a grid. Using GPT-4V, we assessed image consistency for a specific visual attribute. In our example,  
 42 <major attribute> is *lighting*, and <specific attribute> is *moonlight*. For each range we want to verify,  
 43 this sampling is repeated multiple times. If the mean proportion of inconsistent images remains below  
 44 a predefined threshold of 0.1, we consider the images consistent for the selected visual attribute  
 45 within the specified range.

46 **Details on the Human Validation.** For human validation, we clarify that there are 1,400 images in  
 47 total, with 200 images for each attribute. These 200 images are randomly paired based on the same  
 48 attribute description. Human experts are instructed to judge whether the paired images share similar  
 49 visual attributes according to the specific attribute type. Notably, we do not require each image to be  
 50 highly aligned with the text prompt that created it; we only seek visual similarity between the paired  
 51 images. The accuracy for each attribute is visualized in Figure S2.

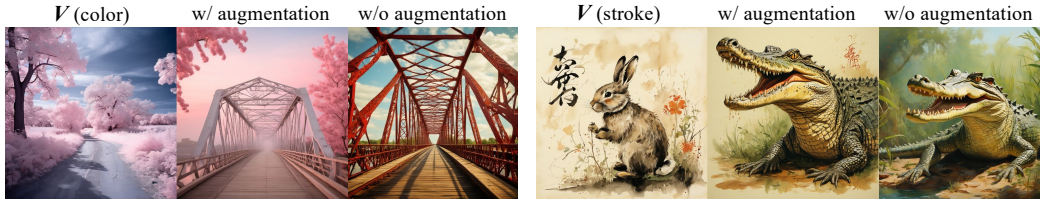

Figure S4: **Ablation on attribute input augmentation.** Models trained with tag augmentation handle slight deviations in input text during inference, while those without augmentation would fail in these cases.

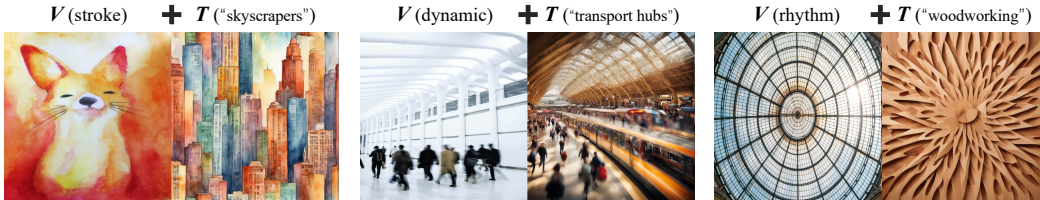

Figure S5: **Examples with real-world images.** We demonstrate that our adapter can be effectively extended to real-world images, which have a different distribution from generated images.

## 52 C Additional Experimental Details

### 53 C.1 Details on Experimental Setup

54 **Implementation Details.** For our methods, our framework’s training and inference setting are similar  
 55 to the IP-Adapter [5]. The learning rate is set to  $2e-5$ , and weight decay is set to  $1e-3$  for stabilizing  
 56 the training. The Q-former, channel projector, and multi-image cross-attention are trained, and other  
 57 parameters are frozen. The training images are resized to  $512 \times 512$ , and the inference resolution is  
 58  $1024 \times 1024$ . The model is trained for three epochs with the randomly shuffled training dataset. For  
 59 each target image, the attribute images are randomly sampled.

60 For the baseline methods, we adopt the official code base and hyper-parameters for IP-Adapter [5],  
 61 DEADiff [3], and Style-Aligned [1], and we use the implementation in diffusers<sup>2</sup> for Dreambooth-  
 62 Lora [4] with only the reference image as training source.

63 **Details on Evaluation** The validation set for the user study contains 100 reference images with  
 64 different visual attribute types. The distribution of the validation set reflects the inherent diversity  
 65 of each attribute. We involve three times more data for the GPT study under the same distribution,  
 66 thanks to its ability to scale up.

67 For the CLIP-Score, we use ViT-L-14 model, and report the cosine similarity between the text  
 68 feature of the target subject and the image feature of the generated image. For the user study,  
 69 we send questionnaires to 30 volunteers with randomly shuffled image options. We are using the  
 70 `gpt-4-turbo-2024-04-09` model for GPT-4V API inference. Detailed instructions for GPT-4V  
 71 can be find in Figure S6.

### 72 C.2 More Results

73 **GPT Study Results** Multi-modal Large Language Models (*e.g.*, GPT-4V(ision)) can offer a more  
 74 scalable alternative to user studies, providing comprehensive analysis and judgment simultaneously.  
 75 Specifically, we instruct the GPT-4V model to complete similar questionnaires as in the user study. An  
 76 example of the instruction and GPT’s output can be found in Figure S6. The GPT study results, shown  
 77 in Table R1, demonstrate that our method outperforms the baselines in most attributes. However, the

<sup>2</sup><https://github.com/huggingface/diffusers>

Table R1: **GPT study results on each attribute type.** The Attr&Sub-Acc here denotes the accuracy when both the attribute transferring and target subject are correct.

| Methods       | Attr&Sub-Acc |              |              |              |              |              |              |              |
|---------------|--------------|--------------|--------------|--------------|--------------|--------------|--------------|--------------|
|               | Color        | Stroke       | Lighting     | Focus&DoF    | Dynamic      | Design       | Rhythm       | Average      |
| DB-Lora       | 0.516        | 0.478        | 0.358        | 0.485        | 0.480        | <u>0.600</u> | <b>0.607</b> | 0.503        |
| IP-Adapter    | 0.323        | 0.403        | 0.340        | 0.364        | 0.520        | 0.440        | 0.500        | 0.413        |
| DEADiff       | 0.161        | 0.209        | 0.245        | 0.485        | 0.400        | 0.080        | 0.357        | 0.277        |
| Style-Aligned | <u>0.581</u> | <u>0.552</u> | <b>0.396</b> | <u>0.606</u> | <b>0.600</b> | <b>0.660</b> | <u>0.571</u> | <u>0.567</u> |
| <b>Ours</b>   | <b>0.780</b> | <b>0.647</b> | <b>0.396</b> | <b>0.727</b> | <u>0.560</u> | 0.510        | 0.521        | <b>0.592</b> |

78 results for Design and Rhythm are not as strong, possibly due to the relatively small data scale for  
79 these two attributes.

80 **Effect of the input attribute augmentation.** During inference, users may present visual information  
81 in various ways. For example, “color” might be referred to as “hue” or “palette,” and “dynamic” as  
82 “motion capture” or “action shot.” Therefore, we add attribute name augmentation during Q-former  
83 training to accommodate diverse user inputs. As shown in Figure S4, when the input text slightly  
84 differs from the standard attribute names during inference, models trained with tag augmentation can  
85 still perform effectively, whereas those without augmentation fail to do so.

86 **Results on real-world data.** We show the generalization ability of the model to some real-world  
87 data collected from Unsplash<sup>3</sup> to verify the model’s generation ability to some attributes beyond the  
88 training set. Results in Figure S5 shows that our adapter can be effectively extended to real-world  
89 images, which have a different distribution than generated images.

## 90 D Limitations and Future Works

91 The main limitation of the dataset is its heavy reliance on the capacity of the generative model, which  
92 might constrain the realism, range of available visual attributes, and attribute accuracy between  
93 paired data. For example, specific attributes like photographic composition techniques or creative  
94 photography can hardly be created in this way. This might also introduce some bias in appearance  
95 distribution introduced by the generative model. In the future, we will consider collecting some  
96 high-quality data from platforms with professional photographers and designers, and involve human  
97 annotation to create paired data, which can further enhance the dataset with a more realistic data  
98 distribution and more complex visual attributes.

## 99 E Datasheet for Datasets

100 The following section contains answers to questions listed in datasheets for the dataset.

### 101 E.1 Motivation

- 102 • For what purpose was the dataset created?  
103 The FiVA dataset is designed to facilitate research in fine-grained visual attributes, enabling  
104 user-friendly customization. It allows users to selectively apply desired attributes to create  
105 images that match their unique preferences and specific content requirements.
- 106 • Who created the dataset (e.g., which team, research group) and on behalf of which entity  
107 (e.g., company, institution, organization)?  
108 The authors of this paper.

<sup>3</sup><https://unsplash.com/>



In this row, there are 6 images, with the leftmost one being the reference image. Now We need to retain the "color palette" attribute from the reference image and transfer it to the new subject "stage pyrotechnics". Images 1 to 5 are the results from 5 different methods. Please determine two things:

1. Do these 5 images match my target subject "stage pyrotechnics"?
2. Do these 5 images satisfy the "color palette" visual attribute from the reference image?

Please provide a simple analysis and then output the final answers in the last two lines. They will each contain a list, with the list saving the image numbers that meet the respective requirements. For example, if images 1, 3, and 5 match the subject, and image 1 matches the attribute, then the final output will be:

**# Example**  
**[2,3,5]**  
**[3]**

THE LAST TWO LINES SHOULD ONLY CONTAIN THESE TWO LISTS!!!

 1. Image 1 contains fireworks integrated within a frame structure, not matching the pyrotechnic display often associated with stage pyrotechnics.  
 2. Image 2 depicts a fiery display within a heart-shaped structure, somewhat representing a pyrotechnic element but still not typical of a staged event.  
 3. Image 3 clearly shows a stage set with a pyrotechnics display, fitting the "stage pyrotechnics" description accurately.  
 4. Image 4 again features a stage with vibrant fireworks, closely matching what you'd expect from "stage pyrotechnics."  
 5. Image 5, while beautifully matching the helmet in the reference in terms of subjects, does not relate to "stage pyrotechnics."

Regarding the "same color palette" attribute from the reference image:  
 - The reference image features a dynamic and vivid color range with predominant reds, blues, greens, and touches of yellow.  
 1. Image 1 attempts to incorporate similar vibrant colors but the colors are less vivid and more subdued compared to the reference.  
 2. Image 2 features intense orange and yellow tones, lacking the broader color variety of the reference.  
 3. Image 3, while mostly featuring golden and warm tones, lacks the varied color palette of the reference.  
 4. Image 4 infuses a rich variety of colors, aligning well with the diverse palette of the reference.  
 5. Image 5 also diligently replicates the reference's color palette with the same rich, vivid colors.

Conclusively:  
**[3,4]**  
**[4,5]**

Figure S6: An example of the input, instruction, and output of the GPT study. GPT-4V shows sufficient ability in understanding the problem and providing comprehensive analysis and judgement to these questions that can hardly be evaluated by other pre-trained models.

- 109 • Who funded the creation of the dataset? If there is an associated grant, please provide the  
 110 name of the grantor and the grant name and number.  
 111 The Chinese University of Hong Kong and Shanghai AI Lab supported this work.

## 112 E.2 Composition

- 113 • What do the instances that comprise the dataset represent (e.g., documents, photos, people,  
 114 countries)?  
 115 The FiVA dataset consists of a number of pairs of images that share similar visual attributes  
 116 and corresponding meta data like attribute type and subject.
- 117 • How many instances are there in total (of each type, if appropriate)?  
 118 The FiVA dataset contains 700K images generated by Playground-V2.5.
- 119 • Does the dataset contain all possible instances or is it a sample (not necessarily random) of  
 120 instances from a larger set?  
 121 The FiVA dataset is a new dataset generated using existing 2D generative models.

- 122 • What data does each instance consist of?  
 123 Each instance contains an image with a prominent visual feature, such as color, stroke,  
 124 lighting, and so on.
- 125 • Is there a label or target associated with each instance?  
 126 Yes.
- 127 • Is any information missing from individual instances? If so, please provide a description,  
 128 explaining why this information is missing (e.g., because it was unavailable). This does not  
 129 include intentionally removed information, but might include, e.g., redacted text.  
 130 N/A.
- 131 • Are relationships between individual instances made explicit (e.g., users' movie ratings,  
 132 social network links)?  
 133 N/A.
- 134 • Are there recommended data splits (e.g., training, development/validation, testing)?  
 135 Yes. We provide a small subset for validation.
- 136 • Are there any errors, sources of noise, or redundancies in the dataset?  
 137 Yes.
- 138 • Is the dataset self-contained, or does it link to or otherwise rely on external resources (e.g.,  
 139 websites, tweets, other datasets)?  
 140 The dataset is self-contained.
- 141 • Does the dataset contain data that might be considered confidential (e.g., data that is protected  
 142 by legal privilege or by doctor– patient confidentiality, data that includes the content of  
 143 individuals' non-public communications)?  
 144 N/A.
- 145 • Does the dataset contain data that, if viewed directly, might be offensive, insulting,  
 146 threatening, or might otherwise cause anxiety?  
 147 N/A.
- 148 • Does the dataset relate to people?  
 149 Yes.
- 150 • Does the dataset identify any subpopulations (e.g., by age, gender)?  
 151 N/A.
- 152 • Is it possible to identify individuals (i.e., one or more natural persons), either directly or  
 153 indirectly (i.e., in combination with other data) from the dataset?  
 154 N/A.
- 155 • Does the dataset contain data that might be considered sensitive in any way (e.g., data that  
 156 reveals race or ethnic origins, sexual orientations, religious beliefs, political opinions or  
 157 union memberships, or locations; financial or health data; biometric or genetic data; forms  
 158 of government identification, such as social security numbers; criminal history)?  
 159 N/A.

### 160 E.3 Collection Process

- 161 • How was the data associated with each instance acquired?  
 162 We used the open-source 2D generative model, Playground-V2.5 [2] to generate the dataset.
- 163 • What mechanisms or procedures were used to collect the data (e.g., hardware apparatuses or  
 164 sensors, manual human curation, software programs, software APIs)?  
 165 We develop an attribute library and subject tree to create the prompts, generate the images,  
 166 and develop a range-sensitive filtering to enhance the pair-wise attribute alignment. We also  
 167 perform human validation to verify the accuracy of the attribute alignment.
- 168 • If the dataset is a sample from a larger set, what was the sampling strategy (e.g., deterministic,  
 169 probabilistic with specific sampling probabilities)?  
 170 N/A.

- 171 • Who was involved in the data collection process (e.g., students, crowdworkers, contractors)  
172 and how were they compensated (e.g., how much were crowdworkers paid)?  
173 The authors of the paper participated in the data collection and verification process.
- 174 • Over what timeframe was the data collected?  
175 The data was collected during April and May of 2024.
- 176 • Were any ethical review processes conducted (e.g., by an institutional review board)?  
177 N/A.
- 178 • Does the dataset relate to people?  
179 Yes.
- 180 • Did you collect the data from the individuals in question directly, or obtain it via third parties  
181 or other sources (e.g., websites)?  
182 We generated the image data.
- 183 • Were the individuals in question notified about the data collection?  
184 The data is not collected from individuals.
- 185 • Did the individuals in question consent to the collection and use of their data?  
186 The data is not collected from individuals.
- 187 • If consent was obtained, were the consenting individuals provided with a mechanism to  
188 revoke their consent in the future or for certain uses?  
189 N/A.
- 190 • Has an analysis of the potential impact of the dataset and its use on data subjects (e.g., a  
191 data protection impact analysis) been conducted?  
192 Yes.

#### 193 **E.4 Preprocessing/cleaning/labeling**

- 194 • Was any preprocessing/cleaning/labeling of the data done (e.g., discretization or bucketing,  
195 tokenization, part-of-speech tagging, SIFT feature extraction, removal of instances,  
196 processing of missing values)?  
197 Yes. We provide a data filter.
- 198 • Was the “raw” data saved in addition to the preprocessed/cleaned/labeled data (e.g., to  
199 support unanticipated future uses)?  
200 Yes.
- 201 • Is the software that was used to preprocess/clean/label the data available?  
202 Yes, we use Python to preprocess/clean/label the data.

#### 203 **E.5 Uses**

- 204 • Has the dataset been used for any tasks already?  
205 Yes, for customized image generation.
- 206 • Is there a repository that links to any or all papers or systems that use the dataset?  
207 No.
- 208 • What (other) tasks could the dataset be used for?  
209 High-level perception tasks like aesthetic analysis.
- 210 • Is there anything about the composition of the dataset or the way it was collected and  
211 preprocessed/cleaned/labeled that might impact future uses?  
212 N/A.
- 213 • Are there tasks for which the dataset should not be used?  
214 N/A.



## 215 E.6 Distribution

- 216 • Will the dataset be distributed to third parties outside of the entity (e.g., company, institution,  
217 organization) on behalf of which the dataset was created?  
218 No.
- 219 • How will the dataset will be distributed (e.g., tarball on website, API, GitHub)?  
220 The dataset are released on Huggingface: <https://huggingface.co/datasets/FiVA/FiVA/>.
- 221 • When will the dataset be distributed?  
222 The dataset will be gradually released starting from June 2024. Due to its large scale, it will  
223 take some time for the dataset to be fully released, considering the uploading speed.
- 224 • Will the dataset be distributed under a copyright or other intellectual property (IP) license,  
225 and/or under applicable terms of use (ToU)?  
226 The dataset will be released under the Playground v2.5 Community License license.
- 227 • Have any third parties imposed IP-based or other restrictions on the data associated with the  
228 instances?  
229 No.
- 230 • Do any export controls or other regulatory restrictions apply to the dataset or to individual  
231 instances?  
232 No.

## 233 E.7 Maintenance

- 234 • Who will be supporting/hosting/maintaining the dataset?  
235 The authors of this paper.
- 236 • How can the owner/curator/manager of the dataset be contacted (e.g., email address)?  
237 Please contact the first author of the paper.
- 238 • Is there an erratum?  
239 No.
- 240 • Will the dataset be updated (e.g., to correct labeling errors, add new instances, delete  
241 instances)?  
242 Yes.
- 243 • If the dataset relates to people, are there applicable limits on the retention of the data  
244 associated with the instances (e.g., were the individuals in question told that their data would  
245 be retained for a fixed period of time and then deleted)?  
246 N/A
- 247 • Will older versions of the dataset continue to be supported/hosted/maintained?  
248 Yes.
- 249 • If others want to extend/augment/build on/contribute to the dataset, is there a mechanism for  
250 them to do so?  
251 Please contact the authors of the paper.

## 252 References

- 253 [1] Amir Hertz, Andrey Voynov, Shlomi Fruchter, and Daniel Cohen-Or. Style aligned image generation via  
254 shared attention. *ArXiv*, abs/2312.02133, 2023.
- 255 [2] Daiqing Li, Aleks Kamko, Ehsan Akhgari, Ali Sabet, Linmiao Xu, and Suhail Doshi. Playground v2.5:  
256 Three insights towards enhancing aesthetic quality in text-to-image generation, 2024.
- 257 [3] Tianhao Qi, Shancheng Fang, Yanze Wu, Hongtao Xie, Jiawei Liu, Lang Chen, Qian He, and Yongdong  
258 Zhang. Deadiff: An efficient stylization diffusion model with disentangled representations. 2024.
- 259 [4] Nataniel Ruiz, Yuanzhen Li, Varun Jampani, Yael Pritch, Michael Rubinstein, and Kfir Aberman.  
260 Dreambooth: Fine tuning text-to-image diffusion models for subject-driven generation. In *CVPR*, pages  
261 22500–22510, 2023.

262 [5] Hu Ye, Jun Zhang, Sib0 Liu, Xiao Han, and Wei Yang. Ip-adapter: Text compatible image prompt adapter  
263 for text-to-image diffusion models. 2023.
